# Supplementary material for: Characterization of three different benzimidazolium ligands and their organo-selenium complexes by using density functional theory and Raman spectroscopy
Source: Royal Society of Chemistry journal article supplement (doi:10.1039/d3ra04931k), 2023-01-01
Supplement: d3ra04931k1.pdf [file d3ra04931k1.pdf]

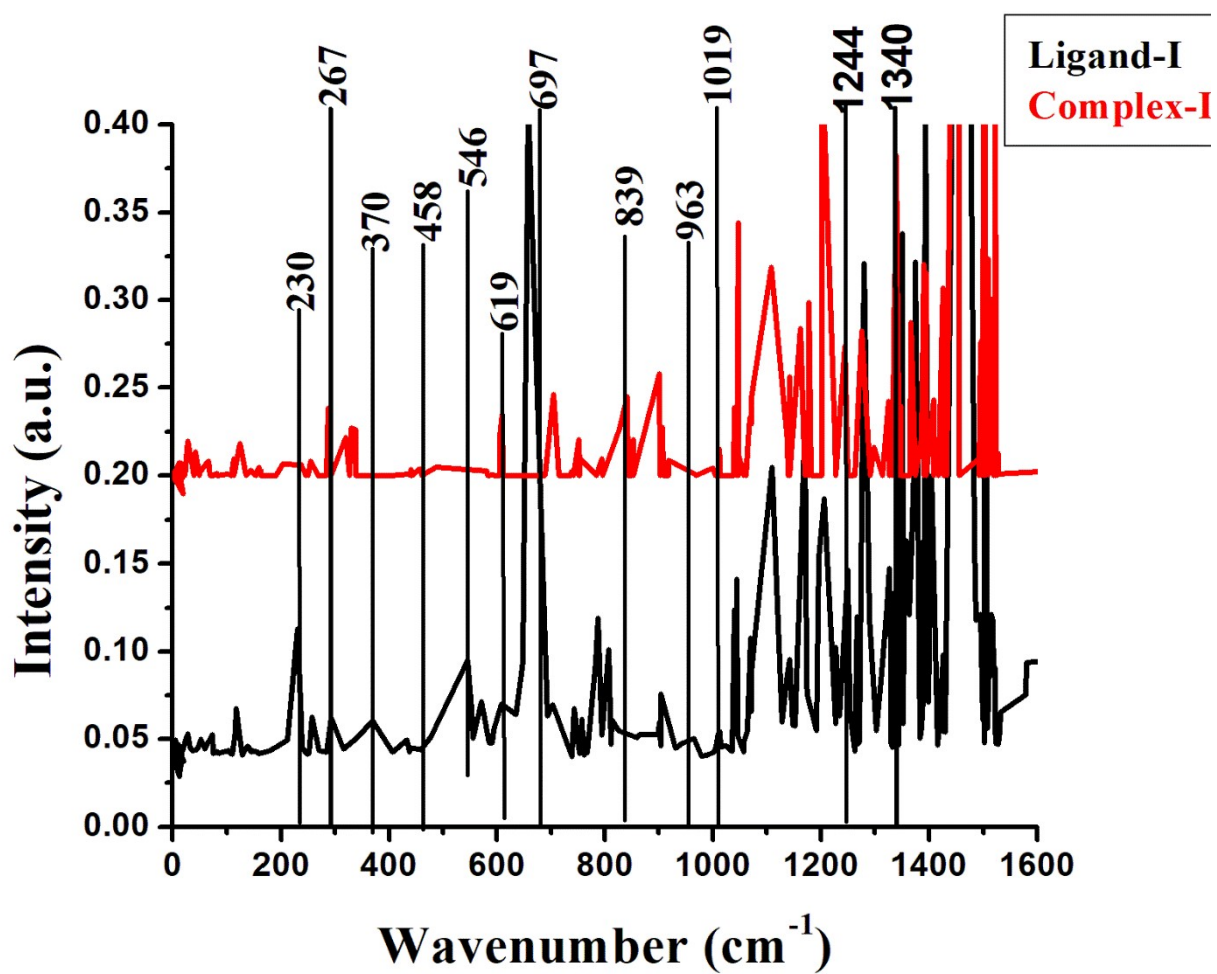

**Figure. S1.** Comparison between DFT calculated mean Raman spectra of ligand-I (L1) and complex-I (C1)

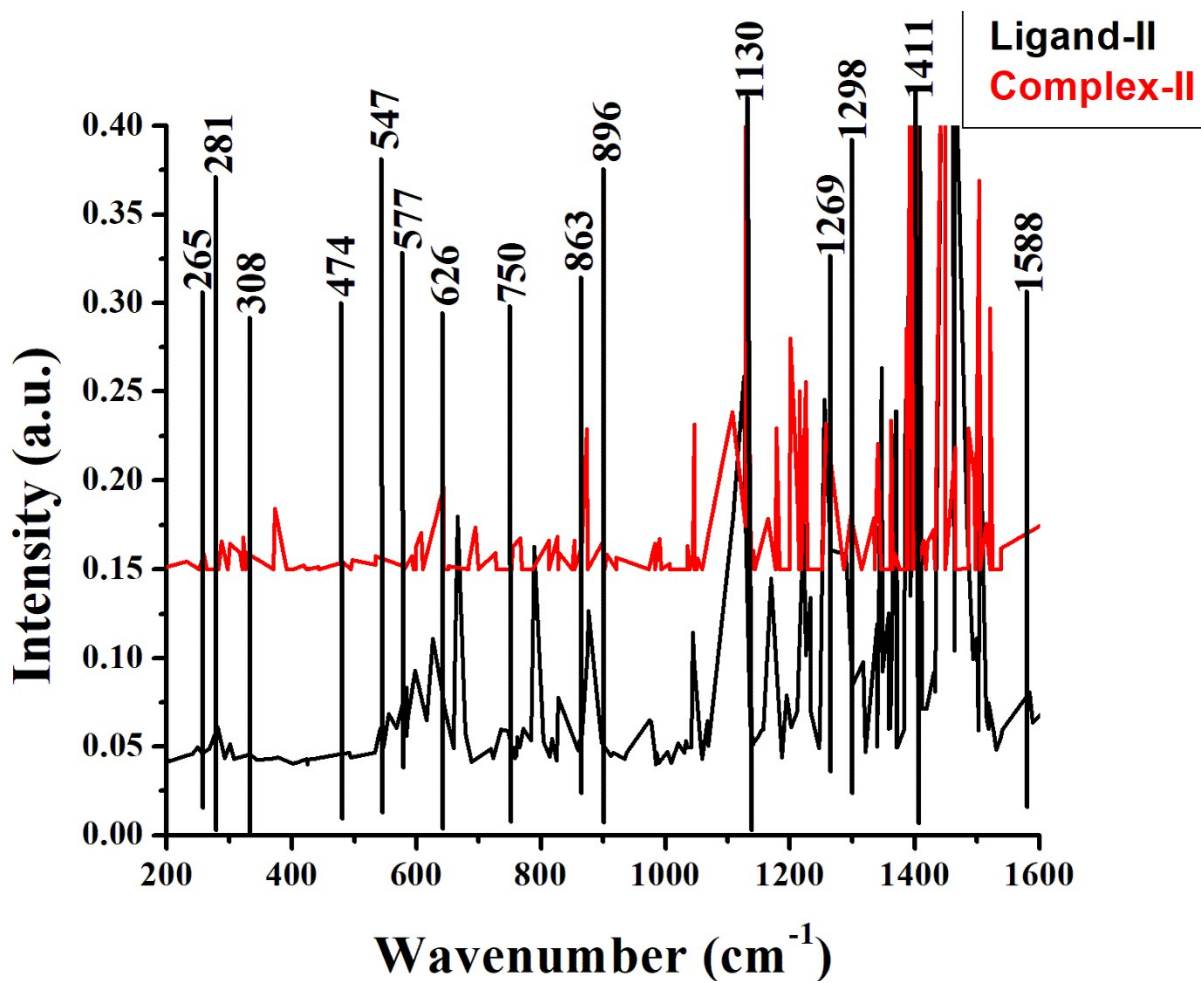

**Figure. S2** Comparison between DFT calculated mean Raman spectra of ligand-II (L2) and complex-II (C2)

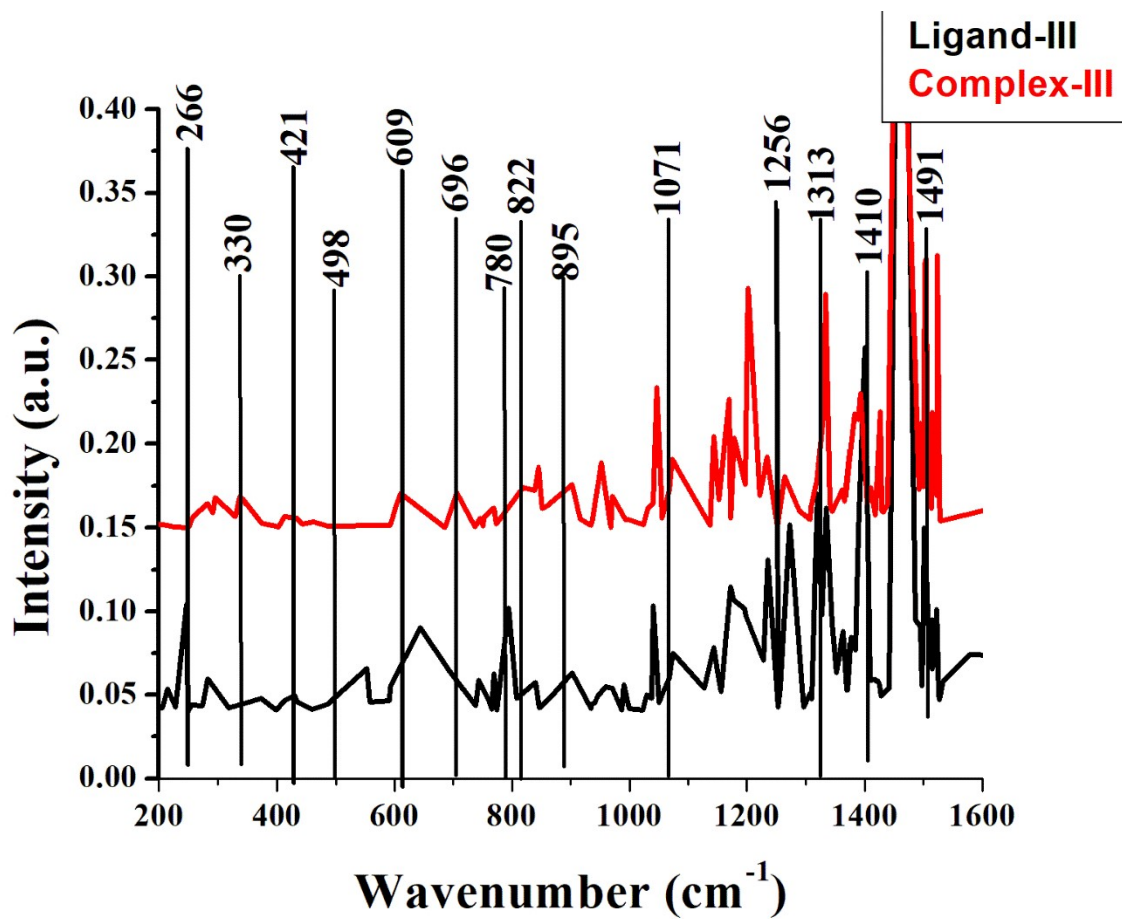

**Figure. S3** Comparison between DFT calculated mean Raman spectra of ligand-III (L3) and complex-III (C3)
